# Supplementary material for: Steric effects of polar substituents evaluated in terms of energy by means of isodesmic reactions
Source: Royal Society of Chemistry journal article supplement (doi:10.1039/b717913h), 2008-01-01
Supplement: b717913h.pdf [file b717913h.pdf]

## Steric effects of the polar substituents evaluated in terms of energy by means of isodesmic reactions

Stanislav Böhm and Otto Exner

Org- Biomol. Chem. 2008, 6,

### Supplementary information

**Table S1** DFT-calculated energies of sterically crowded cyclopropane derivatives **1** to **3**  
(in a. u.)

| Substituent                                   | <b>1</b> $\Delta E$ | <b>2</b> $\Delta E$ | <b>3</b> $\Delta E$ |
|-----------------------------------------------|---------------------|---------------------|---------------------|
| H                                             | -117.9309084        | -275.2290857        | -157.2579373        |
| C $\equiv$ CH                                 | -194.0948265        | -351.3899348        | -233.4216306        |
| CF <sub>3</sub>                               | -455.0862038        | -612.3762048        | -494.4105586        |
| CN                                            | -210.1977365        | -367.4941312        | -249.5251671        |
| Si(CH <sub>3</sub> ) <sub>3</sub>             | -526.6697711        | -683.9591712        | -565.9935877        |
| NH <sub>2</sub>                               | -173.2968432        | -330.5892632        | -212.6225809        |
| NO <sub>2</sub>                               | -322.4977465        | -479.7883340        | -361.8227074        |
| OH                                            | -193.1677423        | -350.4662822        | -232.4971684        |
| OCH <sub>3</sub>                              | -232.4818905        | -389.7770680        | -271.8074088        |
| SO <sub>2</sub> CH <sub>3</sub>               | -705.9051243        | -863.1953047        | -745.2297445        |
| F                                             | -217.1957774        | -374.4917291        | -256.5221648        |
| Cl                                            | -577.5531000        | -734.8471926        | -616.8794002        |
| C $\equiv$ C <sup>-</sup>                     | -193.4788957        | -350.7782931        | -232.8062814        |
| CO <sub>2</sub> <sup>-</sup>                  | -306.0096953        | -463.3044223        | -345.3349930        |
| NH <sub>3</sub> <sup>+</sup>                  | -173.6553086        | -330.9564492        | -212.9840522        |
| N(CH <sub>3</sub> ) <sub>3</sub> <sup>+</sup> | -291.6233002        | -448.9093220        | -231.8953720        |
| O <sup>-</sup>                                | -192.5670923        | -349.8696834        | -231.8953723        |

**Table S2** DFT-calculated bond angles in sterically crowded cyclopropane derivatives **2** and **3**

| Substituent                                   | <b>2</b>                       | <b>2</b>                       | <b>3</b>                       | <b>3</b>                       |
|-----------------------------------------------|--------------------------------|--------------------------------|--------------------------------|--------------------------------|
|                                               | $\vartheta_1 = \angle X-C1-C2$ | $\vartheta_2 = \angle C1-C2-C$ | $\vartheta_1 = \angle X-C1-C2$ | $\vartheta_2 = \angle C1-C2-C$ |
| H                                             |                                | 124.5                          |                                | 120.4                          |
| C≡CH                                          | 124.8                          | 126.9                          | 121.3                          | 121.4                          |
| CF <sub>3</sub>                               | 128.0                          | 131.2                          | 123.5                          | 124.2                          |
| CN                                            | 123.6                          | 126.5                          | 120.3                          | 121.3                          |
| Si(CH <sub>3</sub> ) <sub>3</sub>             | 136.1                          | 129.7                          | 128.7                          | 123.3                          |
| NH <sub>2</sub>                               | 124.1                          | 128.9                          | 124.6                          | 122.1                          |
| NO <sub>2</sub>                               | 123.0                          | 129.4                          | 119.9                          | 123.7                          |
| OH                                            | 118.8                          | 126.4                          | 120.2                          | 121.4                          |
| OCH <sub>3</sub>                              | 119.2                          | 126.3                          | 120.2                          | 121.6                          |
| SO <sub>2</sub> CH <sub>3</sub>               | 127.9                          | 131.1                          | 124.7                          | 124.7                          |
| F                                             | 119.6                          | 126.1                          | 117.8                          | 121.0                          |
| Cl                                            | 124.3                          | 128.9                          | 121.2                          | 122.9                          |
| C≡C <sup>-</sup>                              | 124.1                          | 126.3                          | 121.9                          | 120.4                          |
| CO <sub>2</sub> <sup>-</sup>                  | 124.9                          | 131.1                          | 121.9                          | 122.3                          |
| NH <sub>3</sub> <sup>+</sup>                  | 121.5                          | 126.1                          | 119.1                          | 123.0                          |
| N(CH <sub>3</sub> ) <sub>3</sub> <sup>+</sup> | 133.1                          | 128.9                          | 128.5                          | 128.7                          |
| O <sup>-</sup>                                | 123.4                          | 124.5                          | 122.4                          | 117.9                          |
